# Supplementary material for: Adjacent sequences disclose potential for intra-genomic dispersal of satellite DNA repeats and suggest a complex network with transposable elements
Source: PubMed Central journal article supplement (PMC5139131; doi:10.1186/s12864-016-3347-1), 2016-12-06

**a**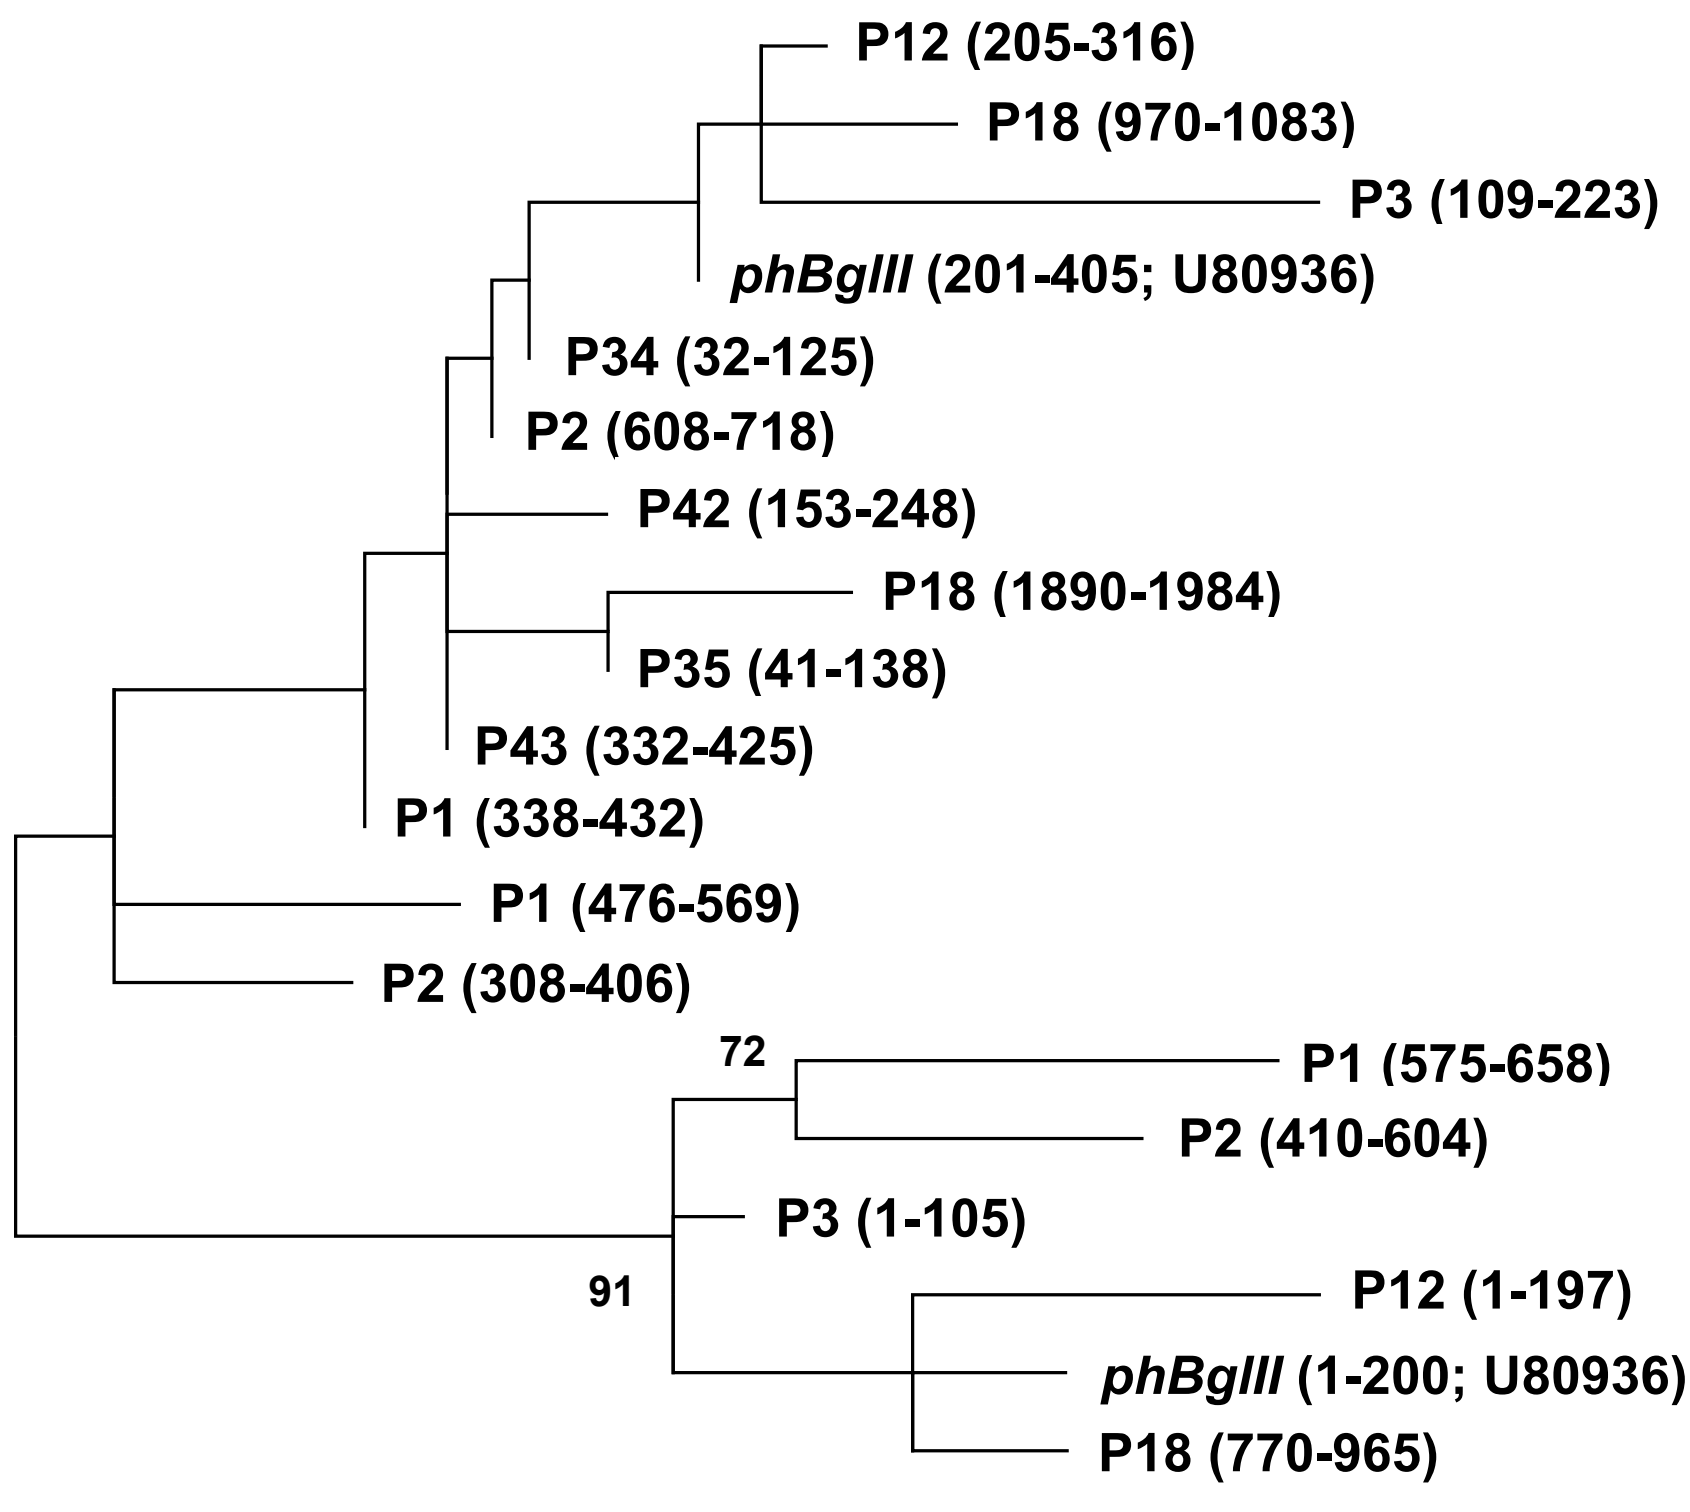**b**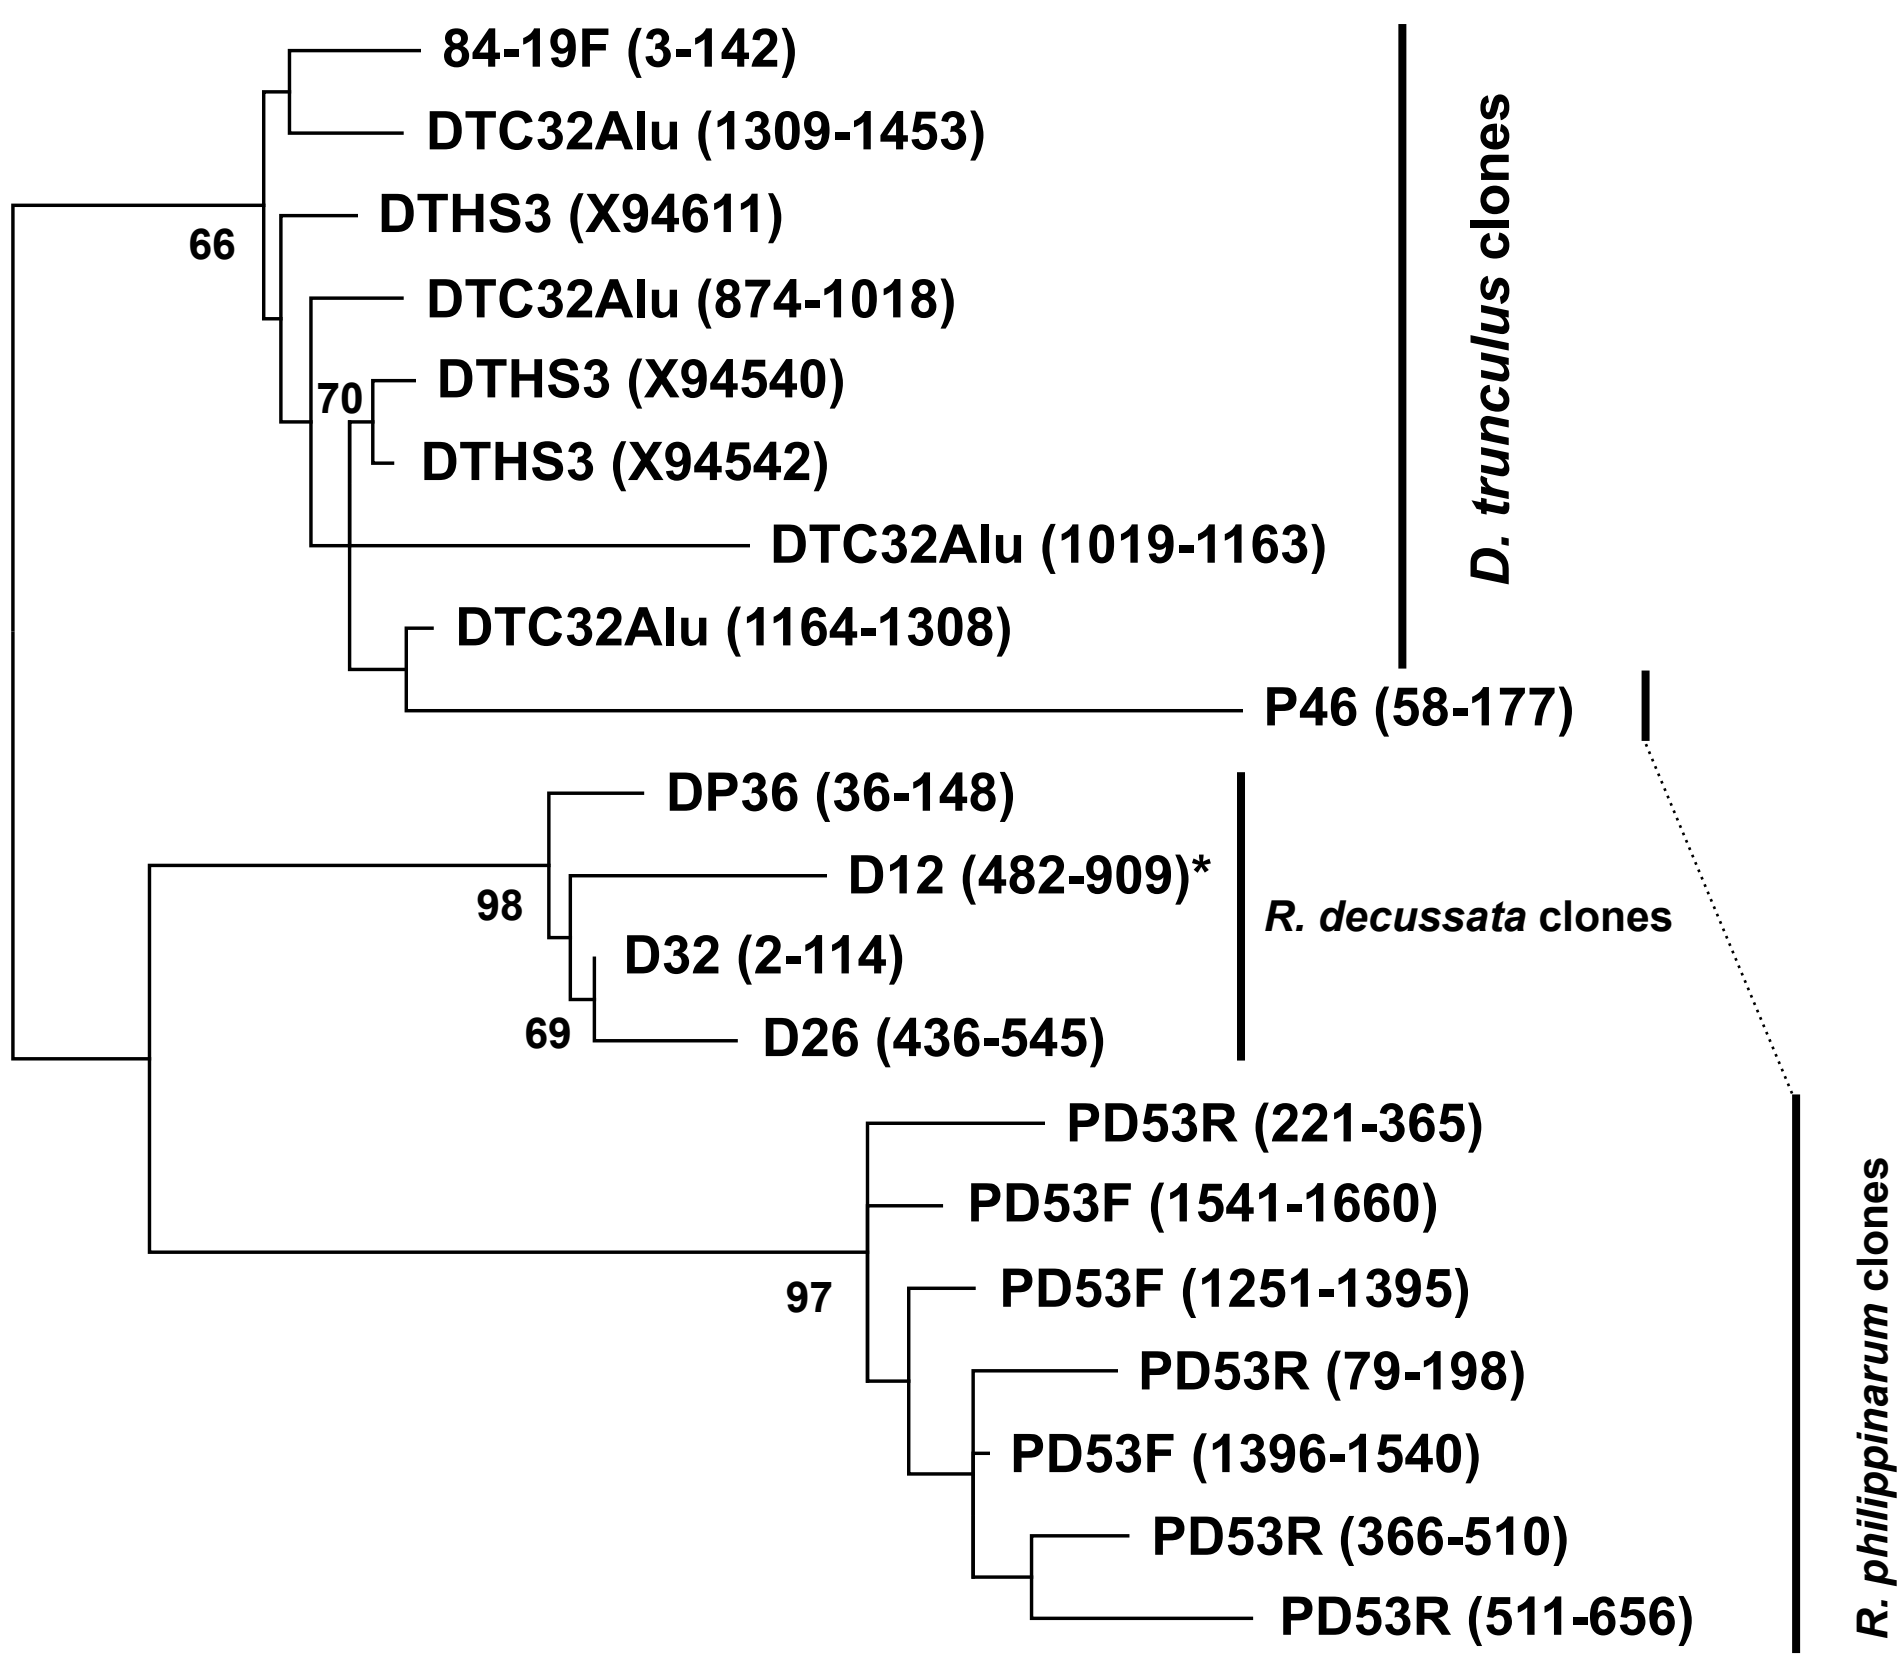**c**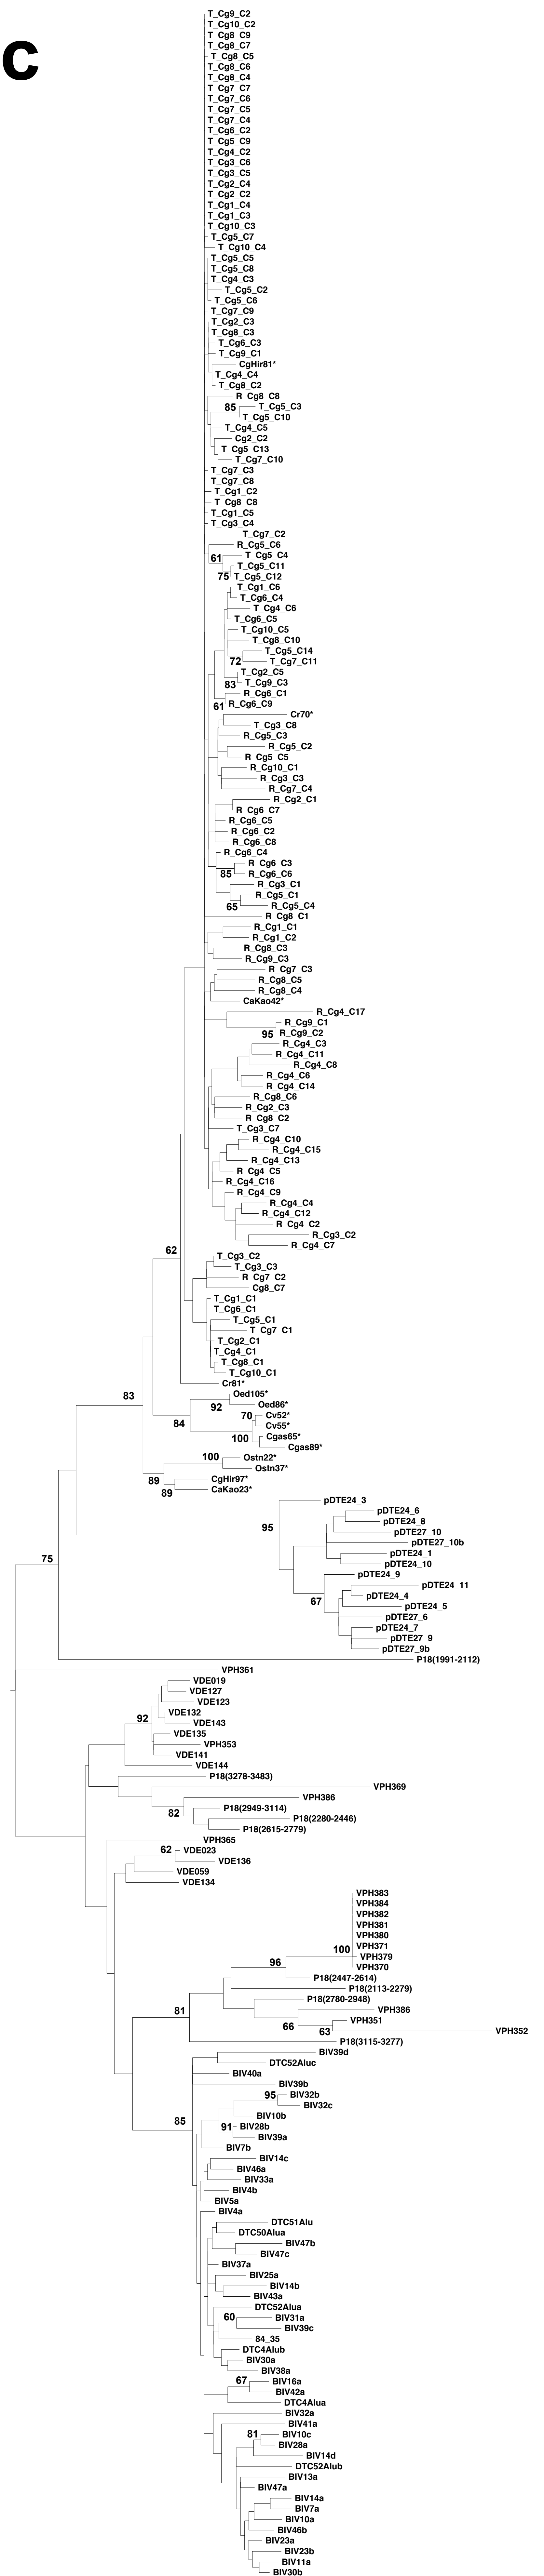

Supplement: 12864_2016_3347_MOESM3_ESM.pdf [file 12864_2016_3347_MOESM3_ESM.pdf]
